# Supplementary material for: Aspergillus Secondary Metabolite Database, a resource to understand the Secondary metabolome of Aspergillus genus
Source: PubMed Central journal article supplement (PMC5544713; doi:10.1038/s41598-017-07436-w), 2017-08-04
Supplement: 41598_2017_7436_MOESM1_ESM.pdf [file 41598_2017_7436_MOESM1_ESM.pdf]

Supplementary Information for the manuscript SREP-17-11102:

**Manuscript Title:** *Aspergillus* Secondary Metabolite Database, a resource to understand the Secondary metabolome of *Aspergillus* genus

**Authors:** Varahalarao Vadlapudi<sup>§#</sup>, Nabajyoti Borah<sup>§#</sup>, Kanaka Raju Yellusani<sup>§#</sup>, Sriramy Gade<sup>§</sup>, Prabhakar Reddy<sup>§</sup>, Maheshwari Rajamanikyam<sup>§</sup>, Lakshmi Narasimha Santosh Vempati<sup>§</sup>, Satya Prakash Gubbala<sup>§</sup>, Pankaj Chopra<sup>§♦</sup>, Suryanarayana Murty Upadhyayula<sup>\*♦</sup>, Ramars Amanchy<sup>\*</sup>

## Supplementary Table 1

### Aspergillus Secondary Metabolites Classification based on IUPAC

Mycotoxins are highlighted in green

| Secondary Metabolite          | MeSH Nomenclature    | IUPAC Classification |
|-------------------------------|----------------------|----------------------|
| Ethanol                       | Acyclic Alcohol      | Alcohol              |
| N-benzoyl-L-phenylalaninol    | Acyclic Alcohol      | Ethanolamines        |
| 1,4-pentadiene                | Acyclic Amine        | Pyridines            |
| AcT1                          | Acyclic Amino acid   | Peptides             |
| Aculin A                      | Acyclic Amino acid   | Peptides             |
| Aspercryptin                  | Acyclic Amino acid   | Oligopeptides        |
| Aspergillomarasmine B         | Acyclic Amino acid   | Aspartic acid        |
| Aspergillomarasmine A         | Acyclic Amino acid   | Aspartic acid        |
| Aspergillus acid A            | Acyclic Amino acid   | Aspartic acid        |
| Aspergillus acid C            | Acyclic Amino acid   | Aspartic acid        |
| Aspergillus acid D            | Acyclic Amino acid   | Aspartic acid        |
| Azonazine                     | Acyclic Amino acid   | Dipeptides           |
| Bicoumanigrin                 | Acyclic Amino acid   | Dipeptides           |
| Cryptoechinuline D            | Acyclic Amino acid   | Alanine              |
| Cryptoechinuline E            | Acyclic Amino acid   | Alanine              |
| Cryptoechinuline F            | Acyclic Amino acid   | Alanine              |
| Cryptoechinuline B            | Acyclic Amino acid   | Alanine              |
| Cryptoechinuline C            | Acyclic Amino acid   | Alanine              |
| Cryptoechinuline G            | Acyclic Amino acid   | Alanine              |
| Cycloaspeptide B              | Acyclic Amino acid   | Peptides             |
| Cycloaspeptide C              | Acyclic Amino acid   | Peptides             |
| Cycloaspeptide A              | Acyclic Amino acid   | Peptides             |
| Desferri-triacetyl-fusigen    | Acyclic Amino acid   | Ornithine            |
| Desoxyverrucarin E            | Acyclic Amino acid   | Ornithine            |
| Echinocandin B                | Acyclic Amino acid   | Peptides             |
| Emerin                        | Acyclic Amino acid   | Thymopoetins         |
| Hydrophobin                   | Acyclic Amino acid   | Fungal Protein       |
| Hydroxymethylsterigmatocystin | Acyclic Amino acid   | Fungal Protein       |
| Miyakamide                    | Acyclic Amino acid   | Peptides             |
| Miyakamide A1                 | Acyclic Amino acid   | Peptides             |
| Miyakamide A2                 | Acyclic Amino acid   | Peptides             |
| Miyakamide B1                 | Acyclic Amino acid   | Peptides             |
| Miyakamide B2                 | Acyclic Amino acid   | Peptides             |
| Oryzamide A                   | Acyclic Amino acid   | Peptides             |
| Restrictocin                  | Acyclic Amino acid   | Fungal Proteins      |
| Scleramide                    | Acyclic Amino acid   | Peptides             |
| Terrelumamide A               | Acyclic Amino acid   | Peptides             |
| Terrelumamide B               | Acyclic Amino acid   | Peptides             |
| Dihydropyridinol              | Acyclic Amino acid   | Oxidoreductase       |
| Hydrazinecarboxamide          | Acyclic Hydrazine    | Hydrazine            |
| Sesquiterpene                 | Acyclic Hydrocarbons | Terpene              |
| Dihydroaspyrone               | Acyclic Ketone       | Pyrones              |

|                                                           |                                     |                    |
|-----------------------------------------------------------|-------------------------------------|--------------------|
| Aspinotriol                                               | Acyclic Ketone                      | Polyketones        |
| Aspinotriol B                                             | Acyclic Ketone                      | Polyketones        |
| Cis-3,6-dibenzyl-3,6-bis(methylthio) piperazine-2,5-dione | Alicyclic Heterocyclic              | Piperazine         |
| Citraconic anhydride                                      | Alicyclic Heterocyclic              | Furan              |
| Flufuran                                                  | Alicyclic Heterocyclic              | Furan              |
| Asperteretal A                                            | Alicyclic Heterocyclic              | Hydroxyfuran       |
| Asperteretal B                                            | Alicyclic Heterocyclic              | Hydroxyfuran       |
| Asperteretal C                                            | Alicyclic Heterocyclic              | Hydroxyfuran       |
| Dehydrocarolic acid                                       | Alicyclic Heterocyclic              | Furans             |
| Carnemycin A                                              | Alicyclic Heterocyclic              | Indole alkaloids   |
| Carnemycin B                                              | Alicyclic Heterocyclic              | Indole alkaloids   |
| Dihydrouridine                                            | Alicyclic Heterocyclic              | Pyrimidine         |
| Nigragillin                                               | Alicyclic Heterocyclic              | Alkaloid           |
| Acetylaranotin                                            | Alicyclic Heterocyclic              | Oxepins            |
| Tenuazonic acid                                           | Alicyclic Heterocyclic              | Pyrollidines       |
| Asperopterin B                                            | Alicyclic Heterocyclic              | Pyrimidine         |
| Asperopterin A                                            | Alicyclic Heterocyclic              | Dihydroxypteridine |
| 13-O-Methylviriditin                                      | Alicyclic Heterocyclic              | Pyrrolidne         |
| Pyripyropene A                                            | Alicyclic Heterocyclic Amine        | Pyridines          |
| Pyripyropene B                                            | Alicyclic Heterocyclic Amine        | Pyridines          |
| Pyripyropene C                                            | Alicyclic Heterocyclic Amine        | Pyridines          |
| Pyripyropene D                                            | Alicyclic Heterocyclic Amine        | Pyridines          |
| Pyripyropene E                                            | Alicyclic Heterocyclic Amine        | Pyridines          |
| Pyripyropene E                                            | Alicyclic Heterocyclic Amine        | Pyridines          |
| Pyripyropene S                                            | Alicyclic Heterocyclic Amine        | Pyridines          |
| Pyripyropene T                                            | Alicyclic Heterocyclic Amine        | Pyridines          |
| Terreic acid                                              | Alicyclic Heterocyclic Diketone     | Quinones           |
| 22-Deacetylanuthone A                                     | Alicyclic Heterocyclic Hydrocarbons | Terpene            |
| 2-Hydroxydiplopterol                                      | Alicyclic Heterocyclic Hydrocarbons | Terpene            |
| 6-epi-ophiobolin K                                        | Alicyclic Heterocyclic Hydrocarbons | Sesterterpenes     |
| 6-methoxy-5(6)-dihydropenicillic acid                     | Alicyclic Heterocyclic Hydrocarbons | Terpene            |
| Austin                                                    | Alicyclic Heterocyclic Hydrocarbons | Terpene            |
| Austinol                                                  | Alicyclic Heterocyclic Hydrocarbons | Terpene            |
| Dehydroaustinol                                           | Alicyclic Heterocyclic Hydrocarbons | Terpene            |
| Dehydroaverufin                                           | Alicyclic Heterocyclic Hydrocarbons | Terpene            |
| Ochraceopone A                                            | Alicyclic Heterocyclic Hydrocarbons | Sesquiterpene      |
| Ochraceopone B                                            | Alicyclic Heterocyclic Hydrocarbons | Sesquiterpene      |
| Ochraceopone C                                            | Alicyclic Heterocyclic Hydrocarbons | Sesquiterpene      |
| Ochraceopone D                                            | Alicyclic Heterocyclic Hydrocarbons | Sesquiterpene      |
| Ochraceopone E                                            | Alicyclic Heterocyclic Hydrocarbons | Sesquiterpene      |
| Ophiobolin                                                | Alicyclic Heterocyclic Hydrocarbons | Sesterterpenes     |
| Ophiobolin A                                              | Alicyclic Heterocyclic              | Sesterterpenes     |

|                                                                                                              |                                     |                |
|--------------------------------------------------------------------------------------------------------------|-------------------------------------|----------------|
|                                                                                                              | Hydrocarbons                        |                |
| Ophiobolin K                                                                                                 | Alicyclic Heterocyclic Hydrocarbons | Sesterterpenes |
| Ophiobolins                                                                                                  | Alicyclic Heterocyclic Hydrocarbons | Sesterterpenes |
| Parasiticolide                                                                                               | Alicyclic Heterocyclic Hydrocarbons | Terpene        |
| Parasiticolide A                                                                                             | Alicyclic Heterocyclic Hydrocarbons | Terpene        |
| Variecolin                                                                                                   | Alicyclic Heterocyclic Hydrocarbons | Terpene        |
| Variecolorin A                                                                                               | Alicyclic Heterocyclic Hydrocarbons | Terpene        |
| Variecolorin B                                                                                               | Alicyclic Heterocyclic Hydrocarbons | Terpene        |
| Variecolorin C                                                                                               | Alicyclic Heterocyclic Hydrocarbons | Terpene        |
| Variecolorin D                                                                                               | Alicyclic Heterocyclic Hydrocarbons | Terpene        |
| Variecolorin E                                                                                               | Alicyclic Heterocyclic Hydrocarbons | Terpene        |
| Variecolorin F                                                                                               | Alicyclic Heterocyclic Hydrocarbons | Terpene        |
| Variecolorin G                                                                                               | Alicyclic Heterocyclic Hydrocarbons | Terpene        |
| Variecolorin H                                                                                               | Alicyclic Heterocyclic Hydrocarbons | Terpene        |
| Variecolorin I                                                                                               | Alicyclic Heterocyclic Hydrocarbons | Terpene        |
| Variecolorin J                                                                                               | Alicyclic Heterocyclic Hydrocarbons | Terpene        |
| Variecolorin K                                                                                               | Alicyclic Heterocyclic Hydrocarbons | Terpene        |
| Variecolorin L                                                                                               | Alicyclic Heterocyclic Hydrocarbons | Terpene        |
| Yanuthone A                                                                                                  | Alicyclic Heterocyclic Hydrocarbons | Terpene        |
| Yanuthone B                                                                                                  | Alicyclic Heterocyclic Hydrocarbons | Terpene        |
| Yanuthone C                                                                                                  | Alicyclic Heterocyclic Hydrocarbons | Terpene        |
| Yanuthone D                                                                                                  | Alicyclic Heterocyclic Hydrocarbons | Terpene        |
| Yanuthone E                                                                                                  | Alicyclic Heterocyclic Hydrocarbons | Terpene        |
| <b>6<math>\beta</math></b> -methoxyergosta-7,22-diene- <b>3<math>\beta</math>,5<math>\alpha</math></b> -diol | Alicyclic Heterocyclic Hydrocarbons | Steroid        |
| Oxylipin                                                                                                     | Alicyclic Heterocyclic Hydrocarbons | Fatty acids    |
| Dehydroaustin                                                                                                | Alicyclic Heterocyclic Hydrocarbons | Polyketides    |
| Epiaspinonediol                                                                                              | Alicyclic Heterocyclic Hydrocarbons | Polyketides    |
| Sequoiamonascin                                                                                              | Alicyclic Heterocyclic Hydrocarbons | Polyketides    |
| Aspyrone                                                                                                     | Alicyclic Heterocyclic Ketone       | Pyrones        |
| Aspyronol                                                                                                    | Alicyclic Heterocyclic Ketone       | Pyrones        |
| Asteltoxin                                                                                                   | Alicyclic Heterocyclic Ketone       | Pyrones        |
| Asteltoxin B                                                                                                 | Alicyclic Heterocyclic Ketone       | Pyrones        |
| Decaturin                                                                                                    | Alicyclic Heterocyclic Ketone       | Pyrones        |
| Kojic acid                                                                                                   | Alicyclic Heterocyclic Ketone       | Pyrones        |
| Maltol                                                                                                       | Alicyclic Heterocyclic Ketone       | Pyrones        |

|                                               |                                |                       |
|-----------------------------------------------|--------------------------------|-----------------------|
| Mellamide                                     | Alicyclic Heterocyclic Ketone  | Pyrones               |
| Decumbenone A                                 | Alicyclic Heterocyclic Ketone  | Ketones               |
| Decumbenone B                                 | Alicyclic Heterocyclic Ketone  | Ketones               |
| Decumbenone C                                 | Alicyclic Heterocyclic Ketone  | Ketones               |
| 1'-O-ethyl-6,8-di-O-methylaverantin           | Alicyclic Heterocyclic Quinone | Anthraquinones        |
| 2-Methyl-1,4-benzoquinone 5,6-epoxide         | Alicyclic Heterocyclic Quinone | Benzo quinone         |
| Helvolic acid                                 | Alicyclic Heterocyclic Terpene | Fusidic acid          |
| (E)-6-(4'-hydroxy-2'-butenyl)-strobilactone A | Alicyclic Heterocyclic Terpene | Sesquiterpene         |
| 14-deacetyl parasiticolide A                  | Alicyclic Heterocyclic Terpene | Sesquiterpene         |
| <b>2a, 9a, 11</b> -trihydroxy-6-oxodrim-7-ene | Alicyclic Heterocyclic Terpene | Terpenoids            |
| Andilesin                                     | Alicyclic Heterocyclic Terpene | Terpenoids            |
| Andilesin A                                   | Alicyclic Heterocyclic Terpene | Terpenoids            |
| Andilesin B                                   | Alicyclic Heterocyclic Terpene | Terpenoids            |
| Andilesin C                                   | Alicyclic Heterocyclic Terpene | Terpenoids            |
| Anditomin                                     | Alicyclic Heterocyclic Terpene | Terpenoids            |
| Dihydrotubingsin B                            | Alicyclic Heterocyclic Terpene | Indole diterpene      |
| Dihydrotubingsin A                            | Alicyclic Heterocyclic Terpene | Indole Terpen         |
| Emindole SC                                   | Alicyclic Heterocyclic Terpene | Alkaloids             |
| Insuetolide A                                 | Alicyclic Heterocyclic Terpene | Terpenoids            |
| Insuetolide B                                 | Alicyclic Heterocyclic Terpene | Terpenoids            |
| Insuetolide C                                 | Alicyclic Heterocyclic Terpene | Terpenoids            |
| Strobilactone A                               | Alicyclic Heterocyclic Terpene | Meroterpenoids        |
| Tetranorlabdane diterpenoid                   | Alicyclic Heterocyclic Terpene | Diterpene             |
| Variocolactol                                 | Alicyclic Heterocyclic Terpene | Sesterterpene         |
| Arestrictin A                                 | Alicyclic Heterocyclic Diamene | Piperazines           |
| Arestrictin B                                 | Alicyclic Heterocyclic Diamene | Piperazines           |
| Quadrilineatin                                | Aromatic Heterocyclic          | Aldehyde              |
| 4-aryl-quinolin-2-one                         | Aromatic Heterocyclic          | Quinolines            |
| 4-Methylprimaquine                            | Aromatic Heterocyclic          | Quinolines            |
| Atromentin                                    | Aromatic Heterocyclic          | Indole alkaloids      |
| Brevianamide K                                | Aromatic Heterocyclic          | Indole alkaloids      |
| Brevianamide M                                | Aromatic Heterocyclic          | Indole alkaloids      |
| Fumigaclavine A                               | Aromatic Heterocyclic          | Indole alkaloids      |
| Fumigaclavine B                               | Aromatic Heterocyclic          | Indole alkaloids      |
| Fumigaclavine C                               | Aromatic Heterocyclic          | Indole alkaloids      |
| Fumigatoside A                                | Aromatic Heterocyclic          | Indole alkaloids      |
| Fumigatoside B                                | Aromatic Heterocyclic          | Indole alkaloids      |
| Fumigatoside C                                | Aromatic Heterocyclic          | Indole alkaloids      |
| Fumigatoside D                                | Aromatic Heterocyclic          | Indole alkaloids      |
| Isotryptoquivaline                            | Aromatic Heterocyclic          | Quinazolinones        |
| Neoechinuline                                 | Aromatic Heterocyclic          | Indole                |
| Norisotryptoquivaline                         | Aromatic Heterocyclic          | Indole                |
| Okaramin                                      | Aromatic Heterocyclic          | Indole alkaloids      |
| Okaramine A                                   | Aromatic Heterocyclic          | Indole alkaloids      |
| Okaramine B                                   | Aromatic Heterocyclic          | Indole alkaloids      |
| Okaramine H                                   | Aromatic Heterocyclic          | Indole alkaloids      |
| O-methyl sterigmatocystin                     | Aromatic Heterocyclic          | Xanthenes             |
| O-Methylidihydrosterigmatocystin              | Aromatic Heterocyclic          | Xanthenes             |
| Physson anthrone B                            | Aromatic Heterocyclic          | Heterocyclic aromatic |
| Rubrofusarin B                                | Aromatic Heterocyclic          | Benzofurans           |
| Rubrofusarin B                                | Aromatic Heterocyclic          | Benzofurans           |

|                              |                       |                  |
|------------------------------|-----------------------|------------------|
| Serantrypinone               | Aromatic Heterocyclic | Indole alkaloids |
| Taichunamide A               | Aromatic Heterocyclic | Indole alkaloids |
| Taichunamide B               | Aromatic Heterocyclic | Indole alkaloids |
| Taichunamide C               | Aromatic Heterocyclic | Indole alkaloids |
| Taichunamide D               | Aromatic Heterocyclic | Indole alkaloids |
| Taichunamide E               | Aromatic Heterocyclic | Indole alkaloids |
| Taichunamide F               | Aromatic Heterocyclic | Indole alkaloids |
| Taichunamide G               | Aromatic Heterocyclic | Indole alkaloids |
| Tubingensin A                | Aromatic Heterocyclic | Alkaloids        |
| Tubingensin B                | Aromatic Heterocyclic | Alkaloids        |
| Versicone A                  | Aromatic Heterocyclic | Alkaloids        |
| Versicone E                  | Aromatic Heterocyclic | Alkaloids        |
| Versicone F                  | Aromatic Heterocyclic | Alkaloids        |
| Versicone G                  | Aromatic Heterocyclic | Alkaloids        |
| Versicone H                  | Aromatic Heterocyclic | Alkaloids        |
| Indol alkaloid               | Aromatic Heterocyclic | Benzopyrrole     |
| Indole                       | Aromatic Heterocyclic | Benzopyrrole     |
| Asperlicin                   | Aromatic Heterocyclic | Benzodiazepenes  |
| Asperlin                     | Aromatic Heterocyclic | Benzodiazepenes  |
| Asperline                    | Aromatic Heterocyclic | Benzodiazepenes  |
| Aspernigrin A                | Aromatic Heterocyclic | Benzodiazepenes  |
| Circumdatin A                | Aromatic Heterocyclic | Benzodiazepenes  |
| Circumdatin B                | Aromatic Heterocyclic | Benzodiazepenes  |
| Circumdatin J                | Aromatic Heterocyclic | Benzodiazepenes  |
| 9-deacetoxyfumigaclavine C   | Aromatic Heterocyclic | Indole           |
| 9-deacetylfumigaclavine C    | Aromatic Heterocyclic | Indole           |
| <b>9</b> -O-2 Brevianamide Q | Aromatic Heterocyclic | Indole           |
| Aflatrem                     | Aromatic Heterocyclic | Indole           |
| Aflavinine                   | Aromatic Heterocyclic | Indole           |
| Amauromine                   | Aromatic Heterocyclic | Indole           |
| Asperazine                   | Aromatic Heterocyclic | Indole           |
| Aspochalamin                 | Aromatic Heterocyclic | Indole           |
| Aspochalasin A               | Aromatic Heterocyclic | Indole           |
| Aspochalasin B               | Aromatic Heterocyclic | Indole           |
| Aspochalasin D               | Aromatic Heterocyclic | Indole           |
| Aspochalasin F               | Aromatic Heterocyclic | Indole           |
| Aspochalasin G               | Aromatic Heterocyclic | Indole           |
| Aspochalasin H               | Aromatic Heterocyclic | Indole           |
| Aspochalasin I               | Aromatic Heterocyclic | Indole           |
| Aspochalasin J               | Aromatic Heterocyclic | Indole           |
| Aspochalasin K               | Aromatic Heterocyclic | Indole           |
| Asposterol                   | Aromatic Heterocyclic | Indole           |
| Aspterric acid               | Aromatic Heterocyclic | Indole           |
| Asterriquinone               | Aromatic Heterocyclic | Indole           |
| Aszonalenin                  | Aromatic Heterocyclic | Indole           |
| Austamide                    | Aromatic Heterocyclic | Indole           |
| Cyclopiazonic Acid           | Aromatic Heterocyclic | Indole           |
| Cytochalasin E               | Aromatic Heterocyclic | Indole           |
| Cytochalasin Z24             | Aromatic Heterocyclic | Indole           |
| Cytochalasins                | Aromatic Heterocyclic | Indole           |
| D-Altritol                   | Aromatic Heterocyclic | Indole           |

|                                                    |                       |             |
|----------------------------------------------------|-----------------------|-------------|
| Demethyl asterriquinone                            | Aromatic Heterocyclic | Indole      |
| Demethylkotanin                                    | Aromatic Heterocyclic | Indole      |
| Dihydroxyflavinine                                 | Aromatic Heterocyclic | Indole      |
| Diketopiperazine                                   | Aromatic Heterocyclic | Indole      |
| Gliotoxin                                          | Aromatic Heterocyclic | Indole      |
| Gliotoxin G (1)                                    | Aromatic Heterocyclic | Indole      |
| Gliotoxin G (2)                                    | Aromatic Heterocyclic | Indole      |
| Notoamide S                                        | Aromatic Heterocyclic | indole      |
| Nygerone A                                         | Aromatic Heterocyclic | Indole      |
| Paraherquamide                                     | Aromatic Heterocyclic | Indolizines |
| Paspaline                                          | Aromatic Heterocyclic | Indole      |
| Paspalinine                                        | Aromatic Heterocyclic | Indole      |
| Preechinulin                                       | Aromatic Heterocyclic | Indole      |
| Sclerotiamide                                      | Aromatic Heterocyclic | Indolizines |
| Speradine A                                        | Aromatic Heterocyclic | Indole      |
| Verruculogen                                       | Aromatic Heterocyclic | Indole      |
| Versicoloid A                                      | Aromatic Heterocyclic | Indole      |
| Versicoloid B                                      | Aromatic Heterocyclic | Indole      |
| 2''-oxoasterriquinol D Me ether                    | Aromatic Heterocyclic | Pyrans      |
| TetrathioAspirochlorinee                           | Aromatic Heterocyclic | Pyrans      |
| 3-methyl-6-methoxy-8hydroxy-3,4-dihydroisocoumarin | Aromatic Heterocyclic | Benzopyrans |
| 6, 8-dihydroxy-3-methylisocoumarin                 | Aromatic Heterocyclic | Benzopyrans |
| 6,8-dihydroxy-3,7-dimethylisocoumarin              | Aromatic Heterocyclic | Benzopyrans |
| Aflatoxin                                          | Aromatic Heterocyclic | Benzopyrans |
| Aflatoxin B                                        | Aromatic Heterocyclic | Benzopyrans |
| Aflatoxin B1                                       | Aromatic Heterocyclic | Benzopyrans |
| Aflatoxin B2b                                      | Aromatic Heterocyclic | Benzopyrans |
| Aflatoxin B3                                       | Aromatic Heterocyclic | Benzopyrans |
| Aflatoxin D1                                       | Aromatic Heterocyclic | Benzopyrans |
| Aflatoxin G                                        | Aromatic Heterocyclic | Benzopyrans |
| Aflatoxin G2a                                      | Aromatic Heterocyclic | Benzopyrans |
| Aflatoxin M1                                       | Aromatic Heterocyclic | Benzopyrans |
| Aflatoxin M2                                       | Aromatic Heterocyclic | Benzopyrans |
| Aflatoxin P1                                       | Aromatic Heterocyclic | Benzopyrans |
| Aflatoxin Q1                                       | Aromatic Heterocyclic | Benzopyrans |
| Aflatoxin-B2a                                      | Aromatic Heterocyclic | Benzopyrans |
| Asperbiphenyl                                      | Aromatic Heterocyclic | Benzopyrans |
| Aurasperone A                                      | Aromatic Heterocyclic | Benzopyrans |
| Aurasperone B                                      | Aromatic Heterocyclic | Benzopyrans |
| Aurasperone D                                      | Aromatic Heterocyclic | Benzopyrans |
| Austdiol                                           | Aromatic Heterocyclic | Benzopyrans |
| Austocystin                                        | Aromatic Heterocyclic | Benzopyrans |
| Austocystin A                                      | Aromatic Heterocyclic | Benzopyrans |
| Canescin                                           | Aromatic Heterocyclic | Benzopyrans |
| Chlorflavonin                                      | Aromatic Heterocyclic | Benzopyrans |
| Dihydrocitrinone                                   | Aromatic Heterocyclic | Benzopyrans |
| Dihydrogeodin                                      | Aromatic Heterocyclic | Benzopyrans |
| Flavipesin A                                       | Aromatic Heterocyclic | Benzopyrans |
| Flavipesin B                                       | Aromatic Heterocyclic | Benzopyrans |
| Isokotanin A                                       | Aromatic Heterocyclic | Benzopyrans |
| Isokotanin B                                       | Aromatic Heterocyclic | Benzopyrans |

|                                                                                    |                              |                        |
|------------------------------------------------------------------------------------|------------------------------|------------------------|
| Isokotanin C                                                                       | Aromatic Heterocyclic        | Benzopyrans            |
| Kotanin                                                                            | Aromatic Heterocyclic        | Benzopyrans            |
| Leporin A                                                                          | Aromatic Heterocyclic        | Benzopyrans            |
| Leporzine A                                                                        | Aromatic Heterocyclic        | Benzopyrans            |
| Leporzine B                                                                        | Aromatic Heterocyclic        | Benzopyrans            |
| Leporzine C                                                                        | Aromatic Heterocyclic        | Benzopyrans            |
| Mellein                                                                            | Aromatic Heterocyclic        | Benzopyrans            |
| Parasiticol                                                                        | Aromatic Heterocyclic        | Benzopyrans            |
| Penicipherol                                                                       | Aromatic Heterocyclic        | Benzopyrans            |
| Pergillin                                                                          | Aromatic Heterocyclic        | Benzopyrans            |
| Phenprocoumon                                                                      | Aromatic Heterocyclic        | Benzopyrans            |
| Pseudodeflectusin                                                                  | Aromatic Heterocyclic        | Benzopyrans            |
| Reticulol                                                                          | Aromatic Heterocyclic        | Benzopyrans            |
| Rubrofusarin                                                                       | Aromatic Heterocyclic        | Benzopyrans            |
| Sclerin                                                                            | Aromatic Heterocyclic        | Benzopyrans            |
| Sclerotiotide F                                                                    | Aromatic Heterocyclic        | Benzopyrans            |
| Silybin A                                                                          | Aromatic Heterocyclic        | Benzopyrans            |
| TMC-256A1                                                                          | Aromatic Heterocyclic        | Benzopyrans            |
| TMC-256C1                                                                          | Aromatic Heterocyclic        | Benzopyrans            |
| TMC-2A                                                                             | Aromatic Heterocyclic        | Benzopyrans            |
| TMC-2A                                                                             | Aromatic Heterocyclic        | Benzopyrans            |
| TMC-2B                                                                             | Aromatic Heterocyclic        | Benzopyrans            |
| TMC-2B                                                                             | Aromatic Heterocyclic        | Benzopyrans            |
| TMC-2C                                                                             | Aromatic Heterocyclic        | Benzopyrans            |
| TMC-2C                                                                             | Aromatic Heterocyclic        | Benzopyrans            |
| Warfarin                                                                           | Aromatic Heterocyclic        | Benzopyrans            |
| Silybin B                                                                          | Aromatic Heterocyclic        | Benzopyran             |
| <b>12<math>\beta</math>-hydroxy-13<math>\alpha</math>-methoxyverruculogen TR-2</b> | <b>Aromatic Heterocyclic</b> | <b>Alkaloids</b>       |
| 13-desoxypaxilline                                                                 | Aromatic Heterocyclic        | Alkaloids              |
| 14-epi-14-hydroxy-10,23-dihydro-24,25-dehydroaflavinine                            | Aromatic Heterocyclic        | Alkaloids              |
| 23-Dihydro-24,25-dehydro-21-oxo-aflavinine                                         | Aromatic Heterocyclic        | Alkaloids              |
| 23-Dihydro-24,25-dehydroaflavinin                                                  | Aromatic Heterocyclic        | Alkaloids              |
| 5,7-Dihydroxy-6-methylphthalide                                                    | Aromatic Heterocyclic        | Benzofuran             |
| Dithiosilvatin                                                                     | Aromatic Heterocyclic        | Alkaloids              |
| Festuclavine                                                                       | Aromatic Heterocyclic        | Alkaloids              |
| Flavasperone                                                                       | Aromatic Heterocyclic        | Alkaloids              |
| Fumimycin                                                                          | Aromatic Heterocyclic        | Benzofuran             |
| Geodin                                                                             | Aromatic Heterocyclic        | Benzofuran             |
| Griseofulvin                                                                       | Aromatic Heterocyclic        | Benzofuran             |
| Karnatakafuran A                                                                   | Aromatic Heterocyclic        | Benzofuran             |
| Karnatakafuran B                                                                   | Aromatic Heterocyclic        | Benzofuran             |
| Neoxaline                                                                          | Aromatic Heterocyclic        | Alkaloids              |
| Nidulin                                                                            | Aromatic Heterocyclic        | Dibenzoxepins          |
| Sequoiatone                                                                        | Aromatic Heterocyclic        | Heterocyclic compounds |
| Sequoiatone B                                                                      | Aromatic Heterocyclic        | Heterocyclic compounds |
| Sequoiatone A                                                                      | Aromatic Heterocyclic        | Heterocyclic compounds |
| 3-hydroxyfumiquinazoline A                                                         | Aromatic Heterocyclic        | Alkaloids              |
| Kipukasin H                                                                        | Aromatic Heterocyclic        | Pyrimidines            |
| Kipukasin I                                                                        | Aromatic Heterocyclic        | Pyrimidines            |

|                             |                                  |                 |
|-----------------------------|----------------------------------|-----------------|
| Kojistatin                  | Aromatic Heterocyclic            | Pyrimidines     |
| Apernigrin A                | Aromatic Heterocyclic            | Pyridine        |
| Apernigrin B                | Aromatic Heterocyclic            | Pyridine        |
| Aspertoxin                  | Aromatic Heterocyclic            | Xanthenes       |
| Asperdurin                  | Aromatic Heterocyclic            | Benzofurans     |
| Asperfurانونe               | Aromatic Heterocyclic            | Benzofurans     |
| Cyclopaldic acid            | Aromatic Heterocyclic            | Benzofurans     |
| Cyclophenol                 | Aromatic Heterocyclic            | Benzofurans     |
| Cycloleucomelon             | Aromatic Heterocyclic            | Terpenyls       |
| Asperxanthone               | Aromatic Heterocyclic            | Xanthone        |
| Austradixanthone            | Aromatic Heterocyclic            | Xanthone        |
| Avenaciolide                | Aromatic Heterocyclic            | Xanthone        |
| cycloisomericeillin         | Aromatic Heterocyclic            | Xanthone        |
| Emerixanthone B             | Aromatic Heterocyclic            | Xanthone        |
| Emerixanthone C             | Aromatic Heterocyclic            | Xanthone        |
| Emerixanthone A             | Aromatic Heterocyclic            | Xanthone        |
| Emerixanthone D             | Aromatic Heterocyclic            | Xanthone        |
| Secalonic acid B            | Aromatic Heterocyclic            | Xanthone        |
| Secalonic Acid D            | Aromatic Heterocyclic            | Xanthone        |
| Sydowinin A                 | Aromatic Heterocyclic            | Xanthone        |
| Sydowinin B                 | Aromatic Heterocyclic            | Xanthone        |
| Sydowinol                   | Aromatic Heterocyclic            | Xanthone        |
| Variecoxanthone A           | Aromatic Heterocyclic            | Xanthone        |
| Variecoxanthone B           | Aromatic Heterocyclic            | Xanthone        |
| Variecoxanthone C           | Aromatic Heterocyclic            | Xanthone        |
| 3-O-methylsterigmatocystin  | Aromatic Heterocyclic            | Xanthenes       |
| 5-methoxysterigmatocystin   | Aromatic Heterocyclic            | Xanthenes       |
| Dihydrosterigmatocystin     | Aromatic Heterocyclic            | Xanthenes       |
| O-Methylsterigmatocystin    | Aromatic Heterocyclic            | Xanthenes       |
| Secalonic Acid F            | Aromatic Heterocyclic            | Xanthenes       |
| Asperubrol                  | Aromatic Heterocyclic            | Phenylpolyenes  |
| Viridicatumtoxin            | Aromatic Heterocyclic Amide      | Carboxamide     |
| 4'-OMe-asperphenamate       | Aromatic Heterocyclic Amino acid | Phenylalanine   |
| Cotteslosin A               | Aromatic Heterocyclic Amino acid | Trysine         |
| Cotteslosin B               | Aromatic Heterocyclic Amino acid | Trysine         |
| Cyclo(D-N-methyl-Leu-L-Trp) | Aromatic Heterocyclic Amino acid | Tryptophan      |
| Mulundocandin               | Aromatic Heterocyclic Amino acid | Cyclic Peptides |
| Psychrophilin E             | Aromatic Heterocyclic Amino acid | Cyclic Peptides |
| Similanamide                | Aromatic Heterocyclic Amino acid | Cyclic Peptides |
| Asperparaline A             | Aromatic Heterocyclic Amino acid | Phenylalanine   |
| Asperparaline B             | Aromatic Heterocyclic Amino acid | Phenylalanine   |
| Asperparalines C            | Aromatic Heterocyclic Amino acid | Phenylalanine   |
| Asperphenamate              | Aromatic Heterocyclic Amino acid | Phenylalanine   |
| Asperpyrone B               | Aromatic Heterocyclic Amino acid | Phenylalanine   |

|                                                           |                                  |                 |
|-----------------------------------------------------------|----------------------------------|-----------------|
| Asperpyrone C                                             | Aromatic Heterocyclic Amino acid | Phenylalanine   |
| Asperpyrone A                                             | Aromatic Heterocyclic Amino acid | Phenylalanine   |
| Cristatin A                                               | Aromatic Heterocyclic Amino acid | Tryptophan      |
| Cristatin A                                               | Aromatic Heterocyclic Amino acid | Tryptophan      |
| Ditryptophenaline                                         | Aromatic Heterocyclic Amino acid | Phenylalanine   |
| Lovastatin                                                | Aromatic Heterocyclic Amino acid | Phenylalanine   |
| Ochratoxin                                                | Aromatic Heterocyclic Amino acid | Phenylalanine   |
| Ochratoxin A                                              | Aromatic Heterocyclic Amino acid | Phenylalanine   |
| Ochratoxin B                                              | Aromatic Heterocyclic Amino acid | Phenylalanine   |
| Ochratoxin C                                              | Aromatic Heterocyclic Amino acid | Phenylalanine   |
| Ochrindole A                                              | Aromatic Heterocyclic Amino acid | Phenylalanine   |
| Ochrindole B                                              | Aromatic Heterocyclic Amino acid | Phenylalanine   |
| Ochrindole C                                              | Aromatic Heterocyclic Amino acid | Phenylalanine   |
| Ochrindole D                                              | Aromatic Heterocyclic Amino acid | Phenylalanine   |
| Malformin                                                 | Aromatic Heterocyclic Amino acid | Cyclic Peptides |
| Malformin A                                               | Aromatic Heterocyclic Amino acid | Cyclic Peptides |
| Malformin A1                                              | Aromatic Heterocyclic Amino acid | Cyclic Peptides |
| Malformin A2                                              | Aromatic Heterocyclic Amino acid | Cyclic Peptides |
| Malformin B1a                                             | Aromatic Heterocyclic Amino acid | Cyclic Peptides |
| Malformin B2                                              | Aromatic Heterocyclic Amino acid | Cyclic Peptides |
| Malformin B3                                              | Aromatic Heterocyclic Amino acid | Cyclic Peptides |
| Malformin C                                               | Aromatic Heterocyclic Amino acid | Cyclic Peptides |
| Malformin E                                               | Aromatic Heterocyclic Amino acid | Cyclic Peptides |
| Alanyltryptophan anhydride                                | Aromatic Heterocyclic Anhydrides | Anhydrides      |
| Cycloechinulin                                            | Aromatic Heterocyclic Diamene    | Piperazines     |
| Emestrin                                                  | Aromatic Heterocyclic Diamene    | Piperazines     |
| Emethacin B                                               | Aromatic Heterocyclic Diamene    | Piperazines     |
| Ent-cycloechinulin                                        | Aromatic Heterocyclic Diamene    | Piperazines     |
| Neoechinulin A                                            | Aromatic Heterocyclic Diamene    | Piperazines     |
| Neoechinulin B                                            | Aromatic Heterocyclic Diamene    | Piperazines     |
| Novoamauromine                                            | Aromatic Heterocyclic Diamene    | Piperazines     |
| Phenylahistin                                             | Aromatic Heterocyclic Diamene    | Piperazines     |
| Aspergillic acid                                          | Aromatic Heterocyclic Diamene    | Pyrazines       |
| 5-N-acetyl-15b-didehydroardeemin                          | Aromatic Heterocyclic Diazene    | Pyrimidinones   |
| 5-N-acetyl- <b>15b<math>\beta</math></b> -hydroxyardeemin | Aromatic Heterocyclic Diazene    | Pyrimidinones   |
| 5-N-acetyl- <b>16a</b> -hydroxyardeemin                   | Aromatic Heterocyclic Diazene    | Pyrimidinones   |

|                                   |                                        |                |
|-----------------------------------|----------------------------------------|----------------|
| 5-N-acetylardeemin                | Aromatic Heterocyclic Diazene          | Pyrimidinones  |
| 5-O-methylsclerone                | Aromatic Heterocyclic Diazene          | Pyrimidinones  |
| 6-Deoxyversicolorin A             | Aromatic Heterocyclic Diketone         | Quinones       |
| 8-O-methylversicolorin A          | Aromatic Heterocyclic Diketone         | Quinones       |
| 8-O-methylversicolorin B          | Aromatic Heterocyclic Diketone         | Quinones       |
| Variolorquinone A                 | Aromatic Heterocyclic Diketone         | Quinones       |
| Variolorquinone B                 | Aromatic Heterocyclic Diketone         | Quinones       |
| Aspernomine                       | Aromatic Heterocyclic Hydrocarbons     | Diterpene      |
| Asperolide A                      | Aromatic Heterocyclic Hydrocarbons     | Diterpene      |
| Asperolide B                      | Aromatic Heterocyclic Hydrocarbons     | Diterpene      |
| Asperolide D                      | Aromatic Heterocyclic Hydrocarbons     | Diterpene      |
| Asperolide E                      | Aromatic Heterocyclic Hydrocarbons     | Diterpene      |
| Aspewentin A                      | Aromatic Heterocyclic Hydrocarbons     | Diterpene      |
| Aspewentin B                      | Aromatic Heterocyclic Hydrocarbons     | Diterpene      |
| Aspewentin C                      | Aromatic Heterocyclic Hydrocarbons     | Diterpene      |
| Aspewentin D                      | Aromatic Heterocyclic Hydrocarbons     | Diterpene      |
| Aspewentin E                      | Aromatic Heterocyclic Hydrocarbons     | Diterpene      |
| Aspewentin F                      | Aromatic Heterocyclic Hydrocarbons     | Diterpene      |
| Aspewentin G                      | Aromatic Heterocyclic Hydrocarbons     | Diterpene      |
| Aspewentin H                      | Aromatic Heterocyclic Hydrocarbons     | Diterpene      |
| Aspirochlorine                    | Aromatic Heterocyclic Hydrocarbons     | Hydrocarbons   |
| Astellolide A                     | Aromatic Heterocyclic Hydrocarbons     | Sesquiterpenes |
| Astellolide B                     | Aromatic Heterocyclic Hydrocarbons     | Sesquiterpenes |
| Austrosene                        | Aromatic Heterocyclic Hydrocarbons     | Sesquiterpenes |
| Aversin                           | Aromatic Heterocyclic Hydrocarbons     | Sesquiterpenes |
| Drimane sesquiterpenoid           | Aromatic Heterocyclic Hydrocarbons     | Sesquiterpenes |
| Drimane                           | Aromatic Heterocyclic Hydrocarbons     | Sesquiterpenes |
| Echinuline                        | Aromatic Heterocyclic Hydrocarbons     | Terpene        |
| Hydroxysydonic acid               | Aromatic Heterocyclic Hydrocarbons     | Sesquiterpene  |
| Hydroxyyanuthone A                | Aromatic Heterocyclic Hydrocarbons     | Terpenes       |
| Hydroxyyanuthone C                | Aromatic Heterocyclic Hydrocarbons     | Terpenes       |
| Nominine                          | Aromatic Heterocyclic Hydrocarbons     | Diterpene      |
| Penitrem                          | Aromatic Heterocyclic Hydrocarbons     | Diterpene      |
| Carboxydiphenylbutenoic anhydride | Aromatic Heterocyclic Hydroxy pyridine | Pyridones      |
| Carneamide A                      | Aromatic Heterocyclic Hydroxy          | Pyridones      |

|                                          |                                        |                |
|------------------------------------------|----------------------------------------|----------------|
|                                          | pyridine                               |                |
| Carneamide B                             | Aromatic Heterocyclic Hydroxy pyridine | Pyridones      |
| Carneamide C                             | Aromatic Heterocyclic Hydroxy pyridine | Pyridones      |
| Oxaline                                  | Aromatic Heterocyclic Imidazole        | Imidazole      |
| 3,6-dihydroxytoluquinone                 | Aromatic Heterocyclic Ketone           | Quinones       |
| 9-chloro-8-hydroxy-8,9-deoxyaspyrone     | Aromatic Heterocyclic Ketone           | Pyrones        |
| Astechrome                               | Aromatic Heterocyclic Ketone           | Pyrones        |
| Campyrone A                              | Aromatic Heterocyclic Ketone           | Pyrones        |
| Campyrone C                              | Aromatic Heterocyclic Ketone           | Pyrones        |
| Carbonarone A                            | Aromatic Heterocyclic Ketone           | Pyrones        |
| Carbonarone B                            | Aromatic Heterocyclic Ketone           | Pyrones        |
| Chevalone B                              | Aromatic Heterocyclic Ketone           | Pyrans         |
| Chevalone C                              | Aromatic Heterocyclic Ketone           | Pyrans         |
| Chevalone E                              | Aromatic Heterocyclic Ketone           | Pyrans         |
| Dechloronidulin                          | Aromatic Heterocyclic Ketone           | Pyrones        |
| Deoxyaverufinone                         | Aromatic Heterocyclic Ketone           | Pyran          |
| Foncesinone A                            | Aromatic Heterocyclic Ketone           | Pyrones        |
| Fonsecinone B                            | Aromatic Heterocyclic Ketone           | Pyrones        |
| Fonsecinone C                            | Aromatic Heterocyclic Ketone           | Pyrones        |
| Fonsecinone D                            | Aromatic Heterocyclic Ketone           | Pyrones        |
| Naphtho- $\gamma$ -pyrone                | Aromatic Heterocyclic Ketone           | Pyrones        |
| Nigerapyrone A                           | Aromatic Heterocyclic Ketone           | Pyrones        |
| Nigerapyrone B                           | Aromatic Heterocyclic Ketone           | Pyrones        |
| Nigerapyrone C                           | Aromatic Heterocyclic Ketone           | Pyrones        |
| Nigerapyrone D                           | Aromatic Heterocyclic Ketone           | Pyrones        |
| Nigerapyrone E                           | Aromatic Heterocyclic Ketone           | Pyrones        |
| Nigerapyrone F                           | Aromatic Heterocyclic Ketone           | Pyrones        |
| Nigerapyrone G                           | Aromatic Heterocyclic Ketone           | Pyrones        |
| Nigerapyrone H                           | Aromatic Heterocyclic Ketone           | Pyrones        |
| Parasperone                              | Aromatic Heterocyclic Ketone           | Pyrone         |
| Pyranonigrin A                           | Aromatic Heterocyclic Ketone           | Pyrones        |
| Pyrophen                                 | Aromatic Heterocyclic Ketone           | Pyrones        |
| Similanpyrone A                          | Aromatic Heterocyclic Ketone           | Pyrones        |
| Similanpyrone B                          | Aromatic Heterocyclic Ketone           | Pyrones        |
| Similanpyrone C                          | Aromatic Heterocyclic Ketone           | Pyrones        |
| Sydowic acid                             | Aromatic Heterocyclic Ketone           | Pyran          |
| 11-O-methylpseurotin A                   | Aromatic Heterocyclic Ketone           | Pyrrolidinones |
| Pseurotin                                | Aromatic Heterocyclic Ketone           | Pyrrolidinones |
| 4,7-dimethoxy-5-methylcoumarin           | Aromatic Heterocyclic Ketone           | Pyrans         |
| 4-hydroxymethyl-5-hydroxy-2H-pyran-2-one | Aromatic Heterocyclic Ketone           | Pyrans         |
| 4-hydroxymethyl-5-hydroxy-2H-pyran-2-one | Aromatic Heterocyclic Ketone           | Pyrans         |
| 5,6-Dimethoxydihydrosterigmatocystin     | Aromatic Heterocyclic Ketone           | Pyrans         |
| Cladosporin                              | Aromatic Heterocyclic Ketone           | Pyrans         |
| Coniochaetone A                          | Aromatic Heterocyclic Ketone           | Pyrans         |
| Meroterpenoid                            | Aromatic Heterocyclic Ketone           | Pyrans         |
| Patulin                                  | Aromatic Heterocyclic Ketone           | Pyrans         |
| Gregatin                                 | Aromatic Heterocyclic Ketone           | Furans         |
| Ascladiol                                | Aromatic Heterocyclic Ketone           | Furans         |

|                                                                   |                                       |                    |
|-------------------------------------------------------------------|---------------------------------------|--------------------|
| Asnipyrone A                                                      | Aromatic Heterocyclic Ketone          | Furans             |
| Asnipyrone B                                                      | Aromatic Heterocyclic Ketone          | Furans             |
| Aspulvinone                                                       | Aromatic Heterocyclic Ketone          | Furans             |
| Aspulvinone D                                                     | Aromatic Heterocyclic Ketone          | Furans             |
| Cyclogregatin                                                     | Aromatic Heterocyclic Ketone          | Furans             |
| Gregatin A                                                        | Aromatic Heterocyclic Ketone          | Furans             |
| Gregatin B                                                        | Aromatic Heterocyclic Ketone          | Furans             |
| Gregatin D                                                        | Aromatic Heterocyclic Ketone          | Furans             |
| Tensidol A                                                        | Aromatic Heterocyclic Ketone          | Furans             |
| Tensidol B                                                        | Aromatic Heterocyclic Ketone          | Furans             |
| Tetronic acid                                                     | Aromatic Heterocyclic Ketone          | Furans             |
| 5,6-dihydro-5(S)-acetoxy-6(S)-(1,2-trans propenyl)-2H-pyran-2-one | Aromatic Heterocyclic Ketone          | Pyrans             |
| 5-hydroxy-8-methyl-2H, 6H-pyrano[3,4-g]chromen-2,6-dione          | Aromatic Heterocyclic Ketone          | Pyrans             |
| O-ethylparvulenone                                                | Aromatic Heterocyclic Ketone          | Ketone             |
| 4-(N-methyl-N-phenylamino) butan-2-one                            | Aromatic Heterocyclic Ketone          | Ketones            |
| Amodin A                                                          | Aromatic Heterocyclic Ketone          | Ketone             |
| Amodin B                                                          | Aromatic Heterocyclic Ketone          | Ketone             |
| Asperasone                                                        | Aromatic Heterocyclic Ketone          | Diketone           |
| Aspersitin                                                        | Aromatic Heterocyclic Ketone          | Ketone             |
| Aspiketolactonol                                                  | Aromatic Heterocyclic Ketone          | Polyketones        |
| Bis-indoyl benzenoid                                              | Aromatic Heterocyclic Ketone          | Ketones            |
| Desmethylkotanin                                                  | Aromatic Heterocyclic Ketone          | Diketone           |
| Erythroglaucin                                                    | Aromatic Heterocyclic Ketone          | Quinone            |
| Funalenone                                                        | Aromatic Heterocyclic Ketone          | Ketones            |
| <b>Viomellin</b>                                                  | <b>Aromatic Heterocyclic Ketone</b>   | <b>Trione</b>      |
| Deoxypodophyllotoxin                                              | Aromatic Heterocyclic Polysaccharides | Lignans            |
| Desacetylaustin                                                   | Aromatic Heterocyclic Polysaccharides | Lignans            |
| <b>Sterigmatocystin</b>                                           | <b>Aromatic Heterocyclic Purines</b>  | <b>Xanthines</b>   |
| Aflatoxin G1                                                      | Aromatic Heterocyclic Purines         | Benzopyrans        |
| Aflatoxin G2                                                      | Aromatic Heterocyclic Purines         | Benzopyrans        |
| Citreoisocoumarin                                                 | Aromatic Heterocyclic Purines         | Benzopyrans        |
| <b>Citreoviridin</b>                                              | <b>Aromatic Heterocyclic Purines</b>  | <b>Aurovertins</b> |
| <b>Citrinin</b>                                                   | <b>Aromatic Heterocyclic Purines</b>  | <b>Benzopyrans</b> |
| Fulvic acid                                                       | Aromatic Heterocyclic Purines         | Benzopyrans        |
| Pestalamide C                                                     | Aromatic Heterocyclic Purines         | Pyranone           |
| 2-hydroxy-3-methyl-1,4-benzoquinone                               | Aromatic Heterocyclic Quinone         | Benzo quinone      |
| 6,8,1'-tri-O-methyl averantin                                     | Aromatic Heterocyclic Quinone         | Anthraquinones     |
| 6,8-di-O-methylaverufin                                           | Aromatic Heterocyclic Quinone         | Anthraquinones     |
| 8-O-methylaverythin                                               | Aromatic Heterocyclic Quinone         | Anthraquinones     |
| Aspergiodiquinone                                                 | Aromatic Heterocyclic Quinone         | Napthoquinones     |
| Aspergluacide                                                     | Aromatic Heterocyclic Quinone         | Napthoquinones     |
| Asperthecin                                                       | Aromatic Heterocyclic Quinone         | Anthraquinones     |
| Averufin                                                          | Aromatic Heterocyclic Quinone         | Anthraquinones     |
| Averythrin                                                        | Aromatic Heterocyclic Quinone         | Anthraquinones     |
| Chrysophanol                                                      | Aromatic Heterocyclic Quinone         | Anthraquinones     |
| Cichorine                                                         | Aromatic Heterocyclic Quinone         | Anthraquinones     |
| Emodin                                                            | Aromatic Heterocyclic Quinone         | Anthraquinones     |
| Pachybasin                                                        | Aromatic Heterocyclic Quinone         | Anthraquinones     |
| Physson                                                           | Aromatic Heterocyclic Quinone         | Anthraquinones     |

| Questin                                                                                                     | Aromatic Heterocyclic Quinone     | Anthraquinones     |
|-------------------------------------------------------------------------------------------------------------|-----------------------------------|--------------------|
| Versicolorin                                                                                                | Aromatic Heterocyclic Quinone     | Anthraquinones     |
| Violaceoid A                                                                                                | Aromatic Heterocyclic Quinone     | Hydroquinones      |
| Violaceoid B                                                                                                | Aromatic Heterocyclic Quinone     | Hydroquinones      |
| Violaceoid C                                                                                                | Aromatic Heterocyclic Quinone     | Hydroquinones      |
| Violaceoid D                                                                                                | Aromatic Heterocyclic Quinone     | Hydroquinones      |
| Violaceoid E                                                                                                | Aromatic Heterocyclic Quinone     | Hydroquinones      |
| Viridicatol                                                                                                 | Aromatic Heterocyclic Quinone     | Hydroxyquinones    |
| 4-methoxybenzyl 7-phenylacetamido-3-vinyl-3-cephem-4-carboxylate                                            | Aromatic Heterocyclic Vitamin D   | Calcitrol          |
| <b>5<math>\alpha</math>,8<math>\alpha</math></b> -epidioxyergosta-6,22-dien- <b>3<math>\beta</math></b> -ol | Aromatic Heterocyclic Vitamin D   | Ergosterol         |
| Isocyathisterol                                                                                             | Aromatic Heterocyclic Vitamin D   | Ergosterol         |
| Rosellichalasin                                                                                             | Aromatic Heterocyclic Vitamin D   | Ergo sterol        |
| Violaceol I                                                                                                 | Aromatic Homocyclic               | Ethers             |
| Violaceol II                                                                                                | Aromatic Homocyclic               | Ethers             |
| Violaceol II                                                                                                | Aromatic Homocyclic               | Ethers             |
| Iizukine A                                                                                                  | Aromatic hydrocarbon Heterocyclic | Diphenyl           |
| Iizukine B                                                                                                  | Aromatic hydrocarbon Heterocyclic | Diphenyl           |
| 2-methoxy-6-(3,4-dihydroxyhepta-1,5-dienyl)benzyl alcohol                                                   | Aromatic hydrocarbon Heterocyclic | Benzyl derivatives |
| 3-Hydroxyterphenyllin                                                                                       | Aromatic hydrocarbon Heterocyclic | Phenylbenzene      |
| 4''-dehydro-3-hydroxyterphenyllin                                                                           | Aromatic hydrocarbon Heterocyclic | Phenylbenzene      |
| Aspergentisyl A                                                                                             | Aromatic hydrocarbon Heterocyclic | Benzyl derivatives |
| Aspergentisyl B                                                                                             | Aromatic hydrocarbon Heterocyclic | Benzyl derivatives |
| Aspergiketal                                                                                                | Aromatic hydrocarbon Heterocyclic | Benzyl derivatives |
| Aspergillazine A                                                                                            | Aromatic hydrocarbon Heterocyclic | Benzyl derivatives |
| Aspergillazine B                                                                                            | Aromatic hydrocarbon Heterocyclic | Benzyl derivatives |
| Aspergillazine C                                                                                            | Aromatic hydrocarbon Heterocyclic | Benzyl derivatives |
| Aspergillazine D                                                                                            | Aromatic hydrocarbon Heterocyclic | Benzyl derivatives |
| Aspergillazine E                                                                                            | Aromatic hydrocarbon Heterocyclic | Benzyl derivatives |
| Candidusin A                                                                                                | Aromatic hydrocarbon Heterocyclic | Phenylbenzene      |
| Candidusin C                                                                                                | Aromatic hydrocarbon Heterocyclic | Phenylbenzene      |
| Candidusin B                                                                                                | Aromatic hydrocarbon Heterocyclic | Phenylbenzene      |
| Carbonarin A                                                                                                | Aromatic hydrocarbon Heterocyclic | Phenylbenzene      |
| Carbonarin B                                                                                                | Aromatic hydrocarbon Heterocyclic | Phenylbenzene      |
| Carbonarin C                                                                                                | Aromatic hydrocarbon Heterocyclic | Phenylbenzene      |
| Carbonarin D                                                                                                | Aromatic hydrocarbon Heterocyclic | Phenylbenzene      |
| Carbonarin E                                                                                                | Aromatic hydrocarbon Heterocyclic | Phenylbenzene      |

|                                                 |                                              |               |
|-------------------------------------------------|----------------------------------------------|---------------|
| Carbonarin F                                    | Aromatic hydrocarbon<br>Heterocyclic         | Phenylbenzene |
| Carbonarin G                                    | Aromatic hydrocarbon<br>Heterocyclic         | Phenylbenzene |
| Carbonarin H                                    | Aromatic hydrocarbon<br>Heterocyclic         | Phenylbenzene |
| Carbonarin I                                    | Aromatic hydrocarbon<br>Heterocyclic         | Phenylbenzene |
| Carbonarin J                                    | Aromatic hydrocarbon<br>Heterocyclic         | Phenylbenzene |
| Prenylcandidusin A                              | Aromatic hydrocarbon<br>Heterocyclic         | Phenylbenzene |
| Prenylcandidusin B                              | Aromatic hydrocarbon<br>Heterocyclic         | Phenylbenzene |
| Prenylcandidusin C                              | Aromatic hydrocarbon<br>Heterocyclic         | Phenylbenzene |
| Prenylterphenyllin A                            | Aromatic hydrocarbon<br>Heterocyclic         | Phenylbenzene |
| Prenylterphenyllin B                            | Aromatic hydrocarbon<br>Heterocyclic         | Phenylbenzene |
| Prenylterphenyllin C                            | Aromatic hydrocarbon<br>Heterocyclic         | Phenylbenzene |
| p-hydroxybenzaldehyde                           | Aromatic aldehyde Homocyclic                 | Benzaldehydes |
| Prenylated benzaldehyde                         | Aromatic aldehyde Homocyclic                 | Benzaldehydes |
| (R)-2-(hydroxymethyl)-3-(2-hydroxypropyl)pheno, | Benzene derivatives Aromatic<br>Heterocyclic | Phenols       |
| 2-O-[14C]Methylorsellinic acid                  | Benzene derivatives Aromatic<br>Heterocyclic | Phenols       |
| 3-methylorsellinate                             | Benzene derivatives Aromatic<br>Heterocyclic | Phenols       |
| Arenarin A                                      | Benzene derivatives Aromatic<br>Heterocyclic | Phenols       |
| Arenarin B                                      | Benzene derivatives Aromatic<br>Heterocyclic | Phenols       |
| Arenarin C                                      | Benzene derivatives Aromatic<br>Heterocyclic | Phenols       |
| Arugosin                                        | Benzene derivatives Aromatic<br>Heterocyclic | Phenols       |
| Arugosin C                                      | Benzene derivatives Aromatic<br>Heterocyclic | Phenols       |
| Arugosin D                                      | Benzene derivatives Aromatic<br>Heterocyclic | Phenols       |
| Arugosin E                                      | Benzene derivatives Aromatic<br>Heterocyclic | Phenols       |
| Arugosin G                                      | Benzene derivatives Aromatic<br>Heterocyclic | Phenols       |
| Arugosin H                                      | Benzene derivatives Aromatic<br>Heterocyclic | Phenols       |
| Arugosin K                                      | Benzene derivatives Aromatic<br>Heterocyclic | Phenols       |
| Arugosin A                                      | Benzene derivatives Aromatic<br>Heterocyclic | Phenols       |
| Arugosin B                                      | Benzene derivatives Aromatic<br>Heterocyclic | Phenols       |
| Dehydrocurvularin                               | Benzene derivatives Aromatic<br>Heterocyclic | Phenols       |
| Diorcinol                                       | Benzene derivatives Aromatic<br>Heterocyclic | Phenols       |
| O-Methylasparvenone                             | Benzene derivatives Aromatic<br>Heterocyclic | Naphthols     |
| Oxoasterriquinol D                              | Benzene derivatives Aromatic<br>Heterocyclic | Benzoid       |
| Mevmevinolin                                    | Benzene derivatives Aromatic                 | Phenol        |

|                                                                                   |                                           |                     |
|-----------------------------------------------------------------------------------|-------------------------------------------|---------------------|
|                                                                                   | Heterocyclic                              |                     |
| Carnequinazoline A                                                                | Benzopyrimidine Aromatic<br>Heterocyclic  | Quinazoline         |
| Carnequinazoline B                                                                | Benzopyrimidine Aromatic<br>Heterocyclic  | Quinazoline         |
| Carnequinazoline C                                                                | Benzopyrimidine Aromatic<br>Heterocyclic  | Quinazoline         |
| Chaetoquadrin F                                                                   | Benzopyrimidine Aromatic<br>Heterocyclic  | Quinazoline         |
| Chrysogine                                                                        | Benzopyrimidine Aromatic<br>Heterocyclic  | Quinazoline         |
| Cottoquinazoline A                                                                | Benzopyrimidine Aromatic<br>Heterocyclic  | Quinazoline         |
| Fumiquinazoline A                                                                 | Benzopyrimidine Aromatic<br>Heterocyclic  | Quinazoline         |
| Fumiquinazoline C                                                                 | Benzopyrimidine Aromatic<br>Heterocyclic  | Quinazoline         |
| Quinazolinone                                                                     | Benzopyrimidine Aromatic<br>Heterocyclic  | Quinazoline         |
| Regulin                                                                           | Benzopyrimidine Aromatic<br>Heterocyclic  | Quinazoline         |
| 3-Nitropropionic acid                                                             | Carboxylic acid Acyclic                   | Propionates         |
| E-2-decenedioic acid                                                              | Carboxylic acid Acyclic                   | Fumaric acid        |
| Ethanedioic acid                                                                  | Carboxylic acid Acyclic                   | Oxolates            |
| 2-Methylene-3hexylbutanedioic acid                                                | Carboxylic acid Acyclic                   | Carboxylic acid     |
| 3-hydroxy-5-methoxy-3-(methoxycarbonyl)-5-oxopentanoic acid                       | Carboxylic acid Acyclic                   | Tricarboxylic acids |
| Aculinic acid                                                                     | Carboxylic acid Acyclic                   | Fatty acids         |
| Asperic acid                                                                      | Carboxylic acid Acyclic                   | Fatty acids         |
| Velutinin                                                                         | Carboxylic acid Acyclic                   | Carboxylic acid     |
| Erdin                                                                             | Carboxylic acid Acyclic                   | Ester               |
| Citric acid                                                                       | Carboxylic acid Acyclic                   | Tricarboxylic acids |
| Fumaric acid                                                                      | Carboxylic acid Acyclic                   | Dicarboxylic acid   |
| Fumonisin                                                                         | Carboxylic acid Acyclic                   | Carboxylic acid     |
| Fumonisin B4                                                                      | Carboxylic acid Acyclic                   | Carboxylic acid     |
| Fumonisin B2                                                                      | Carboxylic acid Acyclic                   | Carboxylic acid     |
| Hexanoic acid                                                                     | Carboxylic acid Acyclic                   | Caproates           |
| Hexylitaconic acid                                                                | Carboxylic acid Acyclic                   | Succinates          |
| Itaconic acid                                                                     | Carboxylic acid Acyclic                   | Succinates          |
| Oxalic acid                                                                       | Carboxylic acid Acyclic                   | Dicarboxylic acid   |
| Phthioic acid                                                                     | Carboxylic acid Acyclic                   | Fatty acids         |
| Succinic acid                                                                     | Carboxylic acid Acyclic                   | Succinates          |
| Tensyic acid A                                                                    | Carboxylic acid Acyclic                   | Dicarboxylic acid   |
| Tensyic acid B                                                                    | Carboxylic acid Acyclic                   | Dicarboxylic acid   |
| Tensyic acid C                                                                    | Carboxylic acid Acyclic                   | Dicarboxylic acid   |
| Tensyic acid D                                                                    | Carboxylic acid Acyclic                   | Dicarboxylic acid   |
| Tensyic acid E                                                                    | Carboxylic acid Acyclic                   | Dicarboxylic acid   |
| Tensyic acid F                                                                    | Carboxylic acid Acyclic                   | Dicarboxylic acid   |
| 2-(3-chloro-4-methyl- $\gamma$ -resorcyloyl)-5-hydroxy-m-anisic acid methyl ester | Carboxylic acid Alicyclic<br>Heterocyclic | Methyl ester        |
| 2-Carboxymethyl-3-hexylmaleic acid anhydride                                      | Carboxylic acid Alicyclic<br>Heterocyclic | Acid anhydride      |
| 3-Furanacetic acid                                                                | Carboxylic acid Alicyclic<br>Heterocyclic | Acetates            |
| <b>Monacolin L</b> $\beta$ -hydroxy acid                                          | Carboxylic acid Alicyclic<br>Heterocyclic | Carboxylic acid     |
| Ergosterol                                                                        | Carboxylic acid Alicyclic                 | Cholestans          |

|                              |                                          |            |
|------------------------------|------------------------------------------|------------|
|                              | Heterocyclic                             |            |
| (7E,7'E)-5,5'-diferulic acid | Carboxylic acid Aromatic<br>Heterocyclic | Cinnamates |
| Asperugin                    | Carboxylic acid Aromatic<br>Heterocyclic | Aldehydes  |
| Asperversin A                | Carboxylic acid Aromatic<br>Heterocyclic | Carbamates |
| Austalide O                  | Carboxylic acid Aromatic<br>Heterocyclic | Esters     |
| Austalide P                  | Carboxylic acid Aromatic<br>Heterocyclic | Esters     |
| Austalide Q                  | Carboxylic acid Aromatic<br>Heterocyclic | Esters     |
| Austalide R                  | Carboxylic acid Aromatic<br>Heterocyclic | Esters     |
| Austalide A                  | Carboxylic acid Aromatic<br>Heterocyclic | Esters     |
| Austalide B                  | Carboxylic acid Aromatic<br>Heterocyclic | Esters     |
| Austalide C                  | Carboxylic acid Aromatic<br>Heterocyclic | Esters     |
| Austalide D                  | Carboxylic acid Aromatic<br>Heterocyclic | Esters     |
| Austalide E                  | Carboxylic acid Aromatic<br>Heterocyclic | Esters     |
| Austalide F                  | Carboxylic acid Aromatic<br>Heterocyclic | Esters     |
| Austalide G                  | Carboxylic acid Aromatic<br>Heterocyclic | Esters     |
| Austalide H                  | Carboxylic acid Aromatic<br>Heterocyclic | Esters     |
| Austalide I                  | Carboxylic acid Aromatic<br>Heterocyclic | Esters     |
| Austalide J                  | Carboxylic acid Aromatic<br>Heterocyclic | Esters     |
| Austalide K                  | Carboxylic acid Aromatic<br>Heterocyclic | Esters     |
| Austalide L                  | Carboxylic acid Aromatic<br>Heterocyclic | Esters     |
| Austalide M                  | Carboxylic acid Aromatic<br>Heterocyclic | Esters     |
| Austalide N                  | Carboxylic acid Aromatic<br>Heterocyclic | Esters     |
| Isodihydroauroglaucin 2      | Carboxylic acid Aromatic<br>Heterocyclic | Benzoates  |
| Isotetrahydroauroglaucin     | Carboxylic acid Aromatic<br>Heterocyclic | Benzoates  |
| Monomethylsulochrin          | Carboxylic acid Aromatic<br>Heterocyclic | Benzoates  |
| Auroglaucine                 | Carboxylic acid Aromatic<br>Heterocyclic | Benzoates  |
| Dihydroauroglaucin           | Carboxylic acid Aromatic<br>Heterocyclic | Benzoates  |
| Flavoglaucin                 | Carboxylic acid Aromatic<br>Heterocyclic | Benzoates  |
| Isodihydroauroglaucin 1      | Carboxylic acid Aromatic<br>Heterocyclic | Benzoates  |
| Isosulochrin                 | Carboxylic acid Aromatic<br>Heterocyclic | Benzoates  |
| Isosulochrin dehydrate       | Carboxylic acid Aromatic<br>Heterocyclic | Benzoates  |
| Sulochrin                    | Carboxylic acid Aromatic<br>Heterocyclic | Benzoates  |

|                                                           |                                          |              |
|-----------------------------------------------------------|------------------------------------------|--------------|
| Ustic acid                                                | Carboxylic acid Aromatic<br>Heterocyclic | Benzoic acid |
| Ustilaginoidin C                                          | Carboxylic acid Aromatic<br>Heterocyclic | Pyrans       |
| Phenyl dioxolanone                                        | Carboxylic acid Aromatic<br>Heterocyclic | Benzoic acid |
| Penicillic acid                                           | Cyclic Ester Acyclic                     | Lactones     |
| (S)-2-(2'-hydroxyethyl)-4-methyl- $\gamma$ -butyrolactone | Cyclic ester Alicyclic<br>Heterocyclic   | Lactone      |
| 6-O-methylaverufin                                        | Cyclic ester Alicyclic<br>Heterocyclic   | Lactones     |
| 8-chloro-9-hydroxy-8,9-deoxyasperlactone                  | Cyclic ester Alicyclic<br>Heterocyclic   | Lactones     |
| Apiaspinonediol                                           | Cyclic ester Alicyclic<br>Heterocyclic   | Lactone      |
| Aspilactonol A                                            | Cyclic ester Alicyclic<br>Heterocyclic   | Lactone      |
| Aspilactonol B                                            | Cyclic ester Alicyclic<br>Heterocyclic   | Lactone      |
| Aspilactonol C                                            | Cyclic ester Alicyclic<br>Heterocyclic   | Lactone      |
| Aspilactonol D                                            | Cyclic ester Alicyclic<br>Heterocyclic   | Lactone      |
| Aspilactonol E                                            | Cyclic ester Alicyclic<br>Heterocyclic   | Lactone      |
| Aspilactonol F                                            | Cyclic ester Alicyclic<br>Heterocyclic   | Lactone      |
| Butenolide                                                | Cyclic ester Alicyclic<br>Heterocyclic   | Lactone      |
| Butyrolactone                                             | Cyclic ester Alicyclic<br>Heterocyclic   | Lactones     |
| Butyrolactone I                                           | Cyclic ester Alicyclic<br>Heterocyclic   | Lactones     |
| Butyrolactone II                                          | Cyclic ester Alicyclic<br>Heterocyclic   | Lactones     |
| Butyrolactone III                                         | Cyclic ester Alicyclic<br>Heterocyclic   | Lactones     |
| Butyrolactone III 1,2-dichloroethane                      | Cyclic ester Alicyclic<br>Heterocyclic   | Lactones     |
| Butyrolactone IV                                          | Cyclic ester Alicyclic<br>Heterocyclic   | Lactones     |
| Canadensolide                                             | Cyclic ester Alicyclic<br>Heterocyclic   | Lactones     |
| dihydropenicillic acid                                    | Cyclic ester Alicyclic<br>Heterocyclic   | Lactones     |
| Folipastatin                                              | Cyclic ester Alicyclic<br>Heterocyclic   | Lactones     |
| Monacolin L lactone                                       | Cyclic ester Alicyclic<br>Heterocyclic   | Lactones     |
| Monorden A                                                | Cyclic ester Alicyclic<br>Heterocyclic   | Lactones     |
| Monorden C                                                | Cyclic ester Alicyclic<br>Heterocyclic   | Lactones     |
| Monorden D                                                | Cyclic ester Alicyclic<br>Heterocyclic   | Lactones     |
| Monorden E                                                | Cyclic ester Alicyclic<br>Heterocyclic   | Lactones     |
| Penicillin                                                | Cyclic ester Alicyclic<br>Heterocyclic   | Lactones     |
| Wentilactone A                                            | Cyclic ester Alicyclic<br>Heterocyclic   | Lactones     |
| Wentilactone A                                            | Cyclic ester Alicyclic<br>Heterocyclic   | Lactones     |

|                                                    |                                            |                      |
|----------------------------------------------------|--------------------------------------------|----------------------|
| Wentilactone B                                     | Cyclic ester Alicyclic Heterocyclic        | Lactones             |
| Xanthoherquein                                     | Cyclic ester Alicyclic Heterocyclic        | Lactones             |
| Antafumicin A                                      | Cyclic ester Aromatic Heterocyclic         | Lactones             |
| Antafumicin B                                      | Cyclic ester Aromatic Heterocyclic         | Lactones             |
| Antibiotic Y                                       | Cyclic ester Aromatic Heterocyclic         | Lactones             |
| Aryl C-glycoside                                   | Cyclic ester Aromatic Heterocyclic         | Lactone              |
| Avertoxin A                                        | Cyclic ester Aromatic Heterocyclic         | Lactones             |
| Avertoxin B                                        | Cyclic ester Aromatic Heterocyclic         | Lactones             |
| Avertoxin C                                        | Cyclic ester Aromatic Heterocyclic         | Lactones             |
| Avertoxin D                                        | Cyclic ester Aromatic Heterocyclic         | Lactones             |
| Nidulol                                            | Cyclic ester Aromatic Heterocyclic         | Lactone              |
| 4R,5S-dihydroxy-3-methoxy-5-methylcyclohex-2-enone | Cyclic Hydrocarbons Alicyclic Heterocyclic | Cyclohexanes         |
| Fumagillin                                         | Cyclic Hydrocarbons Alicyclic Heterocyclic | Cyclohexanes         |
| Parasitenone                                       | Cyclic Hydrocarbons Alicyclic Heterocyclic | Cyclohexanes         |
| Terrein                                            | Cyclic Hydrocarbons Alicyclic Heterocyclic | Cyclopentanes        |
| Benzophenone                                       | Cyclic Hydrocarbons Aromatic Homocyclic    | Hydrocarbons benzene |
| Aspergillicin A                                    | Cyclic peptides Aromatic Heterocyclic      | Cyclodepsipeptides   |
| Aspergillicin B                                    | Cyclic peptides Aromatic Heterocyclic      | Cyclodepsipeptides   |
| Aspergillicin C                                    | Cyclic peptides Aromatic Heterocyclic      | Cyclodepsipeptides   |
| Aspergillicin D                                    | Cyclic peptides Aromatic Heterocyclic      | Cyclodepsipeptides   |
| Aspergillicin E                                    | Cyclic peptides Aromatic Heterocyclic      | Cyclodepsipeptides   |
| Aspergillin                                        | Cyclic peptides Aromatic Heterocyclic      | Cyclodepsipeptides   |
| Aspergillin PZ                                     | Cyclic peptides Aromatic Heterocyclic      | Cyclodepsipeptides   |
| Chloromethyresorcyloylhydroxyanisinate             | Cyclic peptides Aromatic Heterocyclic      | Methyl ester         |
| Deflectin                                          | Ester Aromatic Heterocyclic                | Methylbenzoate       |
| Deflectin A                                        | Ester Aromatic Heterocyclic                | Methylbenzoate       |
| Deflectin B                                        | Ester Aromatic Heterocyclic                | Methylbenzoate       |
| Ethyl atrarate                                     | Ester Aromatic Heterocyclic                | Ester                |
| Neosartorin                                        | Ester Aromatic Heterocyclic                | Dicarboxylic acid    |
| Sulochrin triacetate                               | Ester Aromatic Heterocyclic                | Ester                |
| Andibenin                                          | Ether Alicyclic Heterocyclic               | Methylethers         |
| Andibenin A                                        | Ether Alicyclic Heterocyclic               | Methylethers         |
| Andibenin B                                        | Ether Alicyclic Heterocyclic               | Methylethers         |
| Andibenin C                                        | Ether Alicyclic Heterocyclic               | Methylethers         |
| Asterriquinol D dimethyl ether                     | Ether Alicyclic Heterocyclic               | Dimethyl ether       |
| Ditryptoleucine                                    | Ether Alicyclic Heterocyclic               | Ethers               |

|                                                                 |                                              |               |
|-----------------------------------------------------------------|----------------------------------------------|---------------|
| Oxepin                                                          | Ether Alicyclic Heterocyclic                 | Ethers        |
| Questin diacetate                                               | Ether Alicyclic Heterocyclic                 | Methylethers  |
| Asterric acid                                                   | Ether Aromatic Heterocyclic                  | Phenyl ethers |
| Ethericin A                                                     | Ether Aromatic Heterocyclic                  | Phenyl ethers |
| Ethericin B                                                     | Ether Aromatic Heterocyclic                  | Phenyl ethers |
| Ferulic acid                                                    | Ether Aromatic Heterocyclic                  | Phenyl ethers |
| Diphenyl ether                                                  | Ether Aromatic Homocyclic                    | Ethers        |
| Zygosporin D                                                    | Ketone Acyclic                               | Diketone      |
| 7-ethyl-3,4-dihydro-4,6,8-trihydroxy-1(2H)-naphthalenone        | Polycyclic aromatic Heterocyclic Hydrocarbon | Phenalenones  |
| 7-ethyl-3,4-dihydro-4,8-dihydroxy-6-methoxy-1(2H)-naphthalenone | Polycyclic aromatic Heterocyclic Hydrocarbon | Phenalenones  |
| <b>8'</b> -O-Demethylnigerone                                   | Polycyclic aromatic Heterocyclic Hydrocarbon | Phenalenones  |
| Asparvenone                                                     | Polycyclic aromatic Heterocyclic Hydrocarbon | Phenalenones  |
| Asperaculin A                                                   | Polycyclic aromatic Heterocyclic Hydrocarbon | Phenalenones  |
| Atrovenetin                                                     | Polycyclic aromatic Heterocyclic Hydrocarbon | Phenalenones  |
| Atrovenetin                                                     | Polycyclic aromatic Heterocyclic Hydrocarbon | Phenalenones  |
| Auranthine                                                      | Polycyclic aromatic Heterocyclic Hydrocarbon | Phenalenones  |
| Cis-4-Hydroxymellein                                            | Polycyclic aromatic Heterocyclic Hydrocarbon | Phenalenones  |
| Dianhydroaurasperone C                                          | Polycyclic aromatic Heterocyclic Hydrocarbon | Phenalenones  |
| Fonsecin monomethyl ether                                       | Polycyclic aromatic Heterocyclic Hydrocarbon | Phenalenones  |
| Isoaurasperone A                                                | Polycyclic aromatic Heterocyclic Hydrocarbon | Phenalenones  |
| Isoaurasperone A                                                | Polycyclic aromatic Heterocyclic Hydrocarbon | Phenalenones  |
| Mevastatin                                                      | Polycyclic aromatic Heterocyclic Hydrocarbon | Phenalenones  |
| Mevinolin                                                       | Polycyclic aromatic Heterocyclic Hydrocarbon | Phenalenones  |
| Mevinolinic acid                                                | Polycyclic aromatic Heterocyclic Hydrocarbon | Phenalenones  |
| Monacolin J                                                     | Polycyclic aromatic Heterocyclic Hydrocarbon | Phenalenones  |
| Naphthalenone                                                   | Polycyclic aromatic Heterocyclic Hydrocarbon | Phenalenones  |
| Naphthalic anhydride                                            | Polycyclic aromatic Heterocyclic Hydrocarbon | Phenalenones  |
| Naphthazarin epoxide                                            | Polycyclic aromatic Heterocyclic Hydrocarbon | Phenalenones  |
| Nigerasperone A                                                 | Polycyclic aromatic Heterocyclic Hydrocarbon | Phenalenones  |
| Nigerasperone B                                                 | Polycyclic aromatic Heterocyclic Hydrocarbon | Phenalenones  |
| Nigerasperone C                                                 | Polycyclic aromatic Heterocyclic Hydrocarbon | Phenalenones  |
| Pravastatin                                                     | Polycyclic aromatic Heterocyclic Hydrocarbon | Phenalenones  |
| Fumitremorgin A                                                 | Polycyclic aromatic Heterocyclic Hydrocarbon | Indenes       |
| Fumitremorgin B                                                 | Polycyclic aromatic Heterocyclic Hydrocarbon | Indenes       |
| Fumitremorgin C                                                 | Polycyclic aromatic Heterocyclic Hydrocarbon | Indenes       |

|                                                                                                |                                                 |              |
|------------------------------------------------------------------------------------------------|-------------------------------------------------|--------------|
| O-methylparvulenone                                                                            | Polycyclic aromatic<br>Heterocyclic Hydrocarbon | Napthalenes  |
| Parvulenone                                                                                    | Polycyclic aromatic<br>Heterocyclic Hydrocarbon | Napthalenes  |
| Epi-aculin A                                                                                   | Unclassified                                    | Unclassified |
| Epiheveadide                                                                                   | Unclassified                                    | Unclassified |
| Ergosta-7,22-diene- <b>3<math>\beta</math>,5<math>\alpha</math>,6<math>\beta</math></b> -triol | Unclassified                                    | Unclassified |
| Flavipin                                                                                       | Unclassified                                    | Unclassified |
| Hydroxyaspergillic acid                                                                        | Unclassified                                    | Unclassified |
| JBIR-137                                                                                       | Unclassified                                    | Unclassified |
| JBIR-138                                                                                       | Unclassified                                    | Unclassified |
| Maltoryzine                                                                                    | Unclassified                                    | Unclassified |
| Phomaligin A                                                                                   | Unclassified                                    | Unclassified |
| Radarin                                                                                        | Unclassified                                    | Unclassified |
| Selenite                                                                                       | Unclassified                                    | Unclassified |
| Siderin                                                                                        | Unclassified                                    | Unclassified |
| Sulphinine                                                                                     | Unclassified                                    | Unclassified |
| <b><math>\alpha,\beta</math>-Dehydrocurvularin (<math>\alpha,\beta</math>-DC)</b>              | Unclassified                                    | Unclassified |
| $\alpha$ -sarcin                                                                               | Unclassified                                    | Unclassified |
